# Supplementary material for: DNA-Demethylase Regulated Genes Show Methylation-Independent Spatiotemporal Expression Patterns
Source: PubMed Central journal article supplement (PMC5581395; doi:10.3389/fpls.2017.01449), 2017-08-28
Supplement: Table_4.pdf [file Table_4.pdf]

**Table S4: Analysis of the most prevalent TF binding sites within 250 bp to 1500 bp of the TSS of the 38 most downregulated protein-coding genes in the *ddd* mutant compared to a randomly selected gene list. Data were obtained from the AthaMAP database at stringency of 80%. Number represent total number of TF binding sites identified in all promoters analysed, percent shows the percentage of promoters that carry these sites, and distance to TSS was calculated as median distance. Grey highlighted are TF binding sites that seem enriched in defense-related gene promoters compared to the random gene list.**

| TF type  | most down-regulated genes (n=38) |         |          | random list of genes (n=38) |         |          |
|----------|----------------------------------|---------|----------|-----------------------------|---------|----------|
|          | number                           | percent | distance | number                      | percent | distance |
| bZIP_DOF | 32                               | 45.00%  | 975 bp   | 18                          | 37.00%  | 875 bp   |
| MYB83/46 | 24                               | 50.00%  | 975 bp   | 20                          | 39.50%  | 800 bp   |
| Hox2a    | 22                               | 45.00%  | 875 bp   | 37                          | 63.00%  | 1000 bp  |
| MYC_MYB  | 14                               | 31.50%  | 1000 bp  | 8                           | 18.50%  | 750 bp   |
| MADS     | 13                               | 26.00%  | 800 bp   | 8                           | 18.50%  | 850 bp   |
| LFY      | 9                                | 23.50%  | 700 bp   | 4                           | 10.50%  | 900 bp   |
| ZmHox2a  | 5                                | 13.00%  | 1000 bp  | 14                          | 31.50%  | 900 bp   |
